# Supplementary material for: Relationship between occlusal force and endothelial function in community-dwelling elderly
Source: Research Square preprint supplement (doi:10.21203/rs.3.rs-101563/v2), 2021-02-15
Supplement: Supplementary file 1 [file a07ba56695efe67ed82adec4.docx]

Table 1. Characteristics of participants.

| N=38 |  |
| --- | --- |
| Age (years) | 76.7 ± 5.7 |
| Height (cm) | 150.8 ± 5.4 |
| BMI (kg/m2) | 24.0 ± 4.0 |
| The number of remaining teeth (n) | 19.9 ± 7.7 |

Table 2. Characteristics of parameters measured in participants.

|  | Median | IQR | Minimum | Maximum |
| --- | --- | --- | --- | --- |
| Grip strength (kg) | 22.5 | 6.3 | 8.0 | 32.0 |
| Occlusal force (kN) | 149.5 | 232.3 | 0.0 | 650.0 |
| AGEs (AU) | 2.2 | 0.5 | 1.3 | 3.2 |
| FMD (%)  IQR: interquartile range | 7.1 | 2.1 | 2.6 | 10.4 |

|  | Age | Occlusal force | Grip strength | AGEs | FMD |
| --- | --- | --- | --- | --- | --- |
| Age (years) | 1 | -0.07 | -0.35* | 0.23 | 0.03 |
| Occlusal force (kN) |  | 1 | 0.54** | -0.36* | 0.60** |
| Grip strength (kg) |  |  | 1 | -0.26 | 0.35* |
| AGEs (AU) |  |  |  | 1 | -0.37* |
| FMD (%) |  |  |  |  | 1 |

**p<0.01.　*p<0.05.

Table 3. Correlation matrix of parameters.

Table 4. Multiple regression analysis values with degree of FMD as the dependent variable.

|  | Standard partial regression coefficient | p-value | 95% CI | | R | Adjusted R2 |
| --- | --- | --- | --- | --- | --- | --- |
| Lower | Upper |
| Age (years) | 0.14 | 0.32 | -0.05 | 0.14 | 0.61 | 0.30 |
| Occlusal force (kN) | 0.59 | < 0.01 | 0.00 | 0.01 |  |  |
| Grip strength (kg) | 0.01 | 0.96 | -0.12 | 0.12 |  |  |
| AGEs (AU) | -0.08 | 0.62 | -1.66 | 1.00 |  |  |
